# Supplementary material
Source: publisher site journal article supplement (https://www.spandidos-publications.com/2771/downloadSupplementary)
Supplement: Supplementary file 1 [file downloadSupplementary]

## Sheet: Sheet1
Table SI. Basic clinical traits of human papillomavirus-negative patients with head and neck squamous cell carcinoma listed in TCGA database. TCGA, The Cancer Genome Atlas; ISH, in situ hybridization; T, tumor; N, node; HPV, human papilloma virus.
ID	Age, years	Sex	ISH for detecting HPV	P16 for detecting HPV	Tumor subsite	N stage	T stage	Tumor grade	Recurrence	Perineural invasion	Tobacco smoking history	Alcohol consumption history
TCGA-MT-A51W-01	52	Female	Negative	Negative	Tonsil	NX	T1	G2	No	No	2	Yes
TCGA-CR-7395-01	80	Female	Negative	Negative	Oral Cavity	N0	T2	G2	No	No	3	Yes
TCGA-CR-7394-01	70	Male	Negative	Negative	Oral Tongue	N2c	T3	G2	No	Yes	2	No
TCGA-CR-7393-01	26	Male	Negative	Negative	Oral Tongue	N0	T1	G2	No	No	1	Yes
TCGA-CR-7392-01	67	Female	Negative	Negative	Oral Tongue	N2b	T3	G1	No	Yes	3	No
TCGA-CR-7391-01	36	Female	Negative	Negative	Oral Tongue	N0	T1	G1	No	No	3	Yes
TCGA-CR-7390-01	67	Male	Negative	Negative	Oral Tongue	N0	T3	G2	No	Yes	2	Yes
TCGA-CR-7379-01	78	Female	Negative	Negative	Oral Cavity	N2b	T4a	G2	No	Yes	3	No
TCGA-CR-7376-01	83	Male	Negative	Negative	Oral Cavity	N0	T2	G2	No	No	3	Yes
TCGA-CR-7373-01	66	Male	Negative	Negative	Oral Cavity	N2b	T4a	G2	No	No	3	No
TCGA-CR-7372-01	45	Male	Negative	Negative	Oral Tongue	N0	T2	G1	No	No	1	Yes
TCGA-CR-6492-01	78	Male	Negative	Negative	Hard Palate	N1	T4a	G3	No	Yes	2	Yes
TCGA-CR-6491-01	60	Male	Negative	Negative	Floor of mouth	NX	T4a	G2	Yes	Yes	2	Yes
TCGA-CR-6484-01	67	Female	Negative	Negative	Oral Cavity	N0	T4a	G2	No	No	1	No
TCGA-CR-6477-01	56	Female	Negative	Negative	Base of tongue	N2b	T3	G2	No	Null	3	Yes
TCGA-CN-A63W-01	48	Female	Negative	Negative	Larynx	N2c	T4a	G2	No	Yes	4	Yes
TCGA-CN-A49B-01	71	Male	Negative	Negative	Larynx	N1	T3	G3	No	No	4	Yes
TCGA-CN-A497-01	63	Male	Negative	Negative	Larynx	N2c	T2	G2	No	No	4	No
TCGA-CN-6998-01	53	Male	Negative	Negative	Oral Tongue	N1	T4a	G2	Yes	No	2	No
TCGA-CN-6997-01	66	Male	Negative	Negative	Larynx	N2	T4a	G3	No	Yes	4	No
TCGA-CN-6992-01	61	Male	Negative	Negative	Larynx	N1	T4a	G2	No	No	2	Yes
TCGA-CN-6989-01	64	Male	Negative	Negative	Larynx	N2b	T3	G2	Yes	Yes	2	Yes
TCGA-CN-6988-01	47	Male	Negative	Negative	Larynx	N2b	T4a	G3	No	No	4	Yes
TCGA-CN-6024-01	66	Male	Negative	Negative	Oral Tongue	N2	T4a	G2	No	Yes	2	Yes
TCGA-CN-6023-01	73	Male	Negative	Negative	Larynx	N0	T4a	GX	No	Yes	3	Yes
TCGA-CN-6022-01	49	Male	Negative	Negative	Larynx	N1	T4a	G3	No	Yes	2	Null
TCGA-CN-6020-01	58	Male	Negative	Negative	Oral Cavity	N2c	T3	G2	No	Yes	2	Yes
TCGA-CN-6019-01	61	Male	Negative	Negative	Oral Tongue	N0	T4a	G2	No	Yes	4	Yes
TCGA-CN-6016-01	64	Male	Negative	Negative	Floor of mouth	N1	T4a	G2	No	Yes	2	Yes
TCGA-CN-6013-01	56	Male	Negative	Negative	Alveolar Ridge	N2b	T4a	G3	No	No	1	Yes
TCGA-CN-6012-01	66	Male	Negative	Negative	Larynx	N1	T3	G2	No	No	2	No
TCGA-CN-6010-01	53	Male	Negative	Negative	Larynx	N0	T4a	G2	No	No	2	Yes
TCGA-CN-5373-01	55	Female	Negative	Negative	Floor of mouth	N0	T2	G1	No	Yes	4	Yes
TCGA-CN-5370-01	78	Male	Negative	Negative	Oral Tongue	N0	T2	G3	Yes	Yes	4	Yes
TCGA-CN-5359-01	59	Male	Negative	Negative	Floor of mouth	N1	T4a	G2	Yes	Yes	2	Yes
TCGA-CN-5358-01	60	Male	Negative	Negative	Floor of mouth	N1	T2	G2	Yes	Yes	4	Yes
TCGA-CN-4742-01	48	Female	Negative	Negative	Oral Tongue	N1	T4a	G3	No	Yes	2	Yes
TCGA-CN-4737-01	19	Male	Negative	Negative	Oral Tongue	N0	T2	G2	No	Yes	1	No
TCGA-CN-4735-01	52	Male	Negative	Negative	Larynx	N2b	T3	G3	No	No	2	Yes
TCGA-CN-4734-01	70	Male	Negative	Negative	Buccal Mucosa	N0	T2	G2	No	Yes	4	Yes
TCGA-CN-4733-01	61	Male	Negative	Negative	Oral Tongue	N0	T1	G3	No	Yes	1	No
TCGA-CN-4731-01	63	Female	Negative	Negative	Buccal Mucosa	N2	T4a	G3	No	Yes	4	Yes
TCGA-CN-4727-01	56	Male	Negative	Negative	Larynx	N0	T4a	G2	No	No	4	Yes
TCGA-CN-4726-01	68	Male	Negative	Negative	Buccal Mucosa	N2	T3	G2	Yes	Yes	2	Yes
TCGA-CN-4725-01	60	Male	Negative	Negative	Oral Tongue	N0	T2	G2	No	Yes	1	No
TCGA-BA-A8YP-01	50	Male	Negative	Negative	Oropharynx	N3	T4	G2	No	No	2	Yes
TCGA-BA-A6DL-01	59	Male	Negative	Negative	Oropharynx	N0	T3	G2	No	Null	2	Yes
TCGA-BA-A6DJ-01	62	Male	Negative	Negative	Alveolar Ridge	N2b	T4	G2	Yes	Yes	4	Yes
TCGA-BA-A6DI-01	62	Male	Negative	Negative	Larynx	N0	T3	G2	Yes	Null	2	Yes
TCGA-BA-A6DG-01	49	Male	Negative	Negative	Oral Tongue	N2b	T4a	G2	No	Null	3	Yes
TCGA-BA-A6DE-01	70	Female	Negative	Negative	Oral Tongue	N0	T3	G2	No	No	2	Yes
TCGA-BA-A6DD-01	44	Male	Negative	Negative	Floor of mouth	N2c	T4a	G2	Yes	Yes	2	Yes
TCGA-BA-A6DB-01	24	Female	Negative	Negative	Oral Tongue	N0	T2	G1	Yes	No	1	Yes
TCGA-BA-A4IF-01	59	Male	Negative	Negative	Oropharynx	N0	T4	G2	Yes	Null	4	Yes
